# Supplementary material for: Novel Yersinia enterocolitica Prophages and a Comparative Analysis of Genomic Diversity
Source: Front Microbiol. 2019 May 29;10:1184. doi: 10.3389/fmicb.2019.01184 (PMC6548840; doi:10.3389/fmicb.2019.01184)
Supplement: TABLE S1 — Features of the open reading frames (ORFs) of six prophages. [file Table_1.XLSX]

## Sheet: 工作表2
Contig_id	Feature	Type	Start	Stop	Strand	Function
	_id
YeP1	peg.1	peg	67	522	+	Phage terminase, small subunit, P27 family
YeP1	peg.2	peg	525	2255	+	Phage terminase, large subunit
YeP1	peg.3	peg	2266	2454	+	Phage protein
YeP1	peg.4	peg	2454	3683	+	Phage portal protein
YeP1	peg.5	peg	3673	4323	+	Phage prohead protease, HK97 family
YeP1	peg.6	peg	4339	5547	+	Phage major capsid protein
YeP1	peg.7	peg	5600	5815	+	hypothetical protein
YeP1	peg.8	peg	5834	6148	+	hypothetical protein
YeP1	peg.9	peg	6145	6537	+	hypothetical protein
YeP1	peg.10	peg	6537	7055	+	Phage protein (ACLAME 956)
YeP1	peg.11	peg	7052	7603	+	FIG111678: IS, phage, Tn; Transposon-related functions
YeP1	peg.12	peg	7610	7816	+	Phage protein
YeP1	peg.13	peg	7813	9306	+	Bacteriophage tail sheath protein
YeP1	peg.14	peg	9307	9663	+	Phage tail tube protein
YeP1	peg.15	peg	9660	9941	+	hypothetical protein
YeP1	peg.16	peg	10065	11945	+	Phage tail length tape-measure protein
YeP1	peg.17	peg	11996	13300	+	Phage tail/DNA circulation protein
YeP1	peg.18	peg	13297	14370	+	FIG003269: Prophage tail protein
YeP1	peg.19	peg	14370	14936	+	Prophage baseplate assembly protein V
YeP1	peg.20	peg	14940	15353	+	Bacteriophage protein GP46
YeP1	peg.21	peg	15346	16404	+	Putative protein JayE from lambdoid prophage e14 region
YeP1	peg.22	peg	16395	16976	+	Uncharacterized protein YmfQ in lambdoid prophage e14 region
YeP1	peg.23	peg	16983	18182	+	Prophage tail fiber protein
YeP1	peg.24	peg	18198	18380	+	hypothetical protein
YeP1	peg.25	peg	18472	19587	+	hypothetical protein
YeP1	peg.26	peg	19925	19680	-	DNA-damage-inducible protein I
YeP1	peg.27	peg	20211	19936	-	hypothetical protein
YeP1	peg.28	peg	20533	21093	+	hypothetical protein; Some similarities with unknown protein of Photorhabdus and with bacteriophage protein
YeP1	peg.29	peg	21090	21497	+	hypothetical protein
YeP1	peg.30	peg	22605	21514	-	Phage integrase family protein
YeP1	peg.31	peg	23141	22884	-	hypothetical protein
YeP1	peg.32	peg	23769	23197	-	FIG01046459: hypothetical protein
YeP1	peg.33	peg	24183	23770	-	hypothetical protein
YeP1	peg.34	peg	24387	24196	-	hypothetical protein
YeP1	peg.35	peg	24977	24375	-	hypothetical protein
YeP1	peg.36	peg	25342	24977	-	Phage protein
YeP1	peg.37	peg	25913	25344	-	hypothetical protein
YeP1	peg.38	peg	26089	25913	-	hypothetical protein
YeP1	peg.39	peg	26619	26086	-	COG1896: Predicted hydrolases of HD superfamily
YeP1	peg.40	peg	26877	26638	-	hypothetical protein
YeP1	peg.41	peg	27864	26956	-	hypothetical protein
YeP1	peg.42	peg	28161	28394	+	hypothetical protein
YeP1	peg.43	peg	28651	28391	-	hypothetical protein
YeP1	peg.44	peg	29523	28867	-	SOS-response repressor and protease LexA (EC 3.4.21.88)
YeP1	peg.45	peg	29622	29819	+	hypothetical protein
YeP1	peg.46	peg	29848	30381	+	hypothetical protein
YeP1	peg.47	peg	30389	30550	+	hypothetical protein
YeP1	peg.48	peg	30744	31760	+	Replication protein O
YeP1	peg.49	peg	31757	32227	+	hypothetical protein
YeP1	peg.50	peg	32220	32933	+	DNA adenine methylase (EC 2.1.1.72)
YeP1	peg.51	peg	32930	33313	+	Holliday junction resolvase / Crossover junction endodeoxyribonuclease rusA (EC 3.1.22.-)
YeP1	peg.52	peg	33300	33416	+	hypothetical protein
YeP1	peg.53	peg	33413	34222	+	Phage protein
YeP1	peg.54	peg	34219	35220	+	Uncharacterized protein, YdfU family
YeP1	peg.55	peg	35297	36115	+	Phage antitermination protein Q
YeP1	rna.1	rna	36309	36383	+	tRNA-Pseudo-TTG
YeP1	rna.2	rna	36457	36530	+	tRNA-Met-CAT
YeP1	rna.3	rna	36536	36607	+	tRNA-Gly-TCC
YeP1	peg.56	peg	36782	37126	+	Phage holin #Lambda-like group I holin
YeP1	peg.57	peg	37129	37755	+	Phage endolysin or lysozyme (ACLAME 32)
YeP1	peg.58	peg	37752	38084	+	hypothetical protein
YeP1	peg.59	peg	38119	38289	+	hypothetical protein
YeP1	peg.60	peg	38452	38925	+	hypothetical protein
YeP1	peg.61	peg	39340	38933	-	hypothetical protein
YeP2	peg.1	peg	78	533	+	phage terminase, small subunit, putative, P27 family
YeP2	peg.2	peg	536	2266	+	Phage terminase, large subunit
YeP2	peg.3	peg	2277	2465	+	Phage protein
YeP2	peg.4	peg	2465	3694	+	Phage portal protein
YeP2	peg.5	peg	3684	4334	+	Phage capsid and scaffold
YeP2	peg.6	peg	4350	5558	+	Phage major capsid protein
YeP2	peg.7	peg	5611	5826	+	hypothetical protein
YeP2	peg.8	peg	5845	6159	+	Sb8
YeP2	peg.9	peg	6156	6548	+	Sb9
YeP2	peg.10	peg	6548	7066	+	Phage protein
YeP2	peg.11	peg	7063	7614	+	FIG111678: IS, phage, Tn; Transposon-related functions
YeP2	peg.12	peg	7621	7827	+	hypothetical protein
YeP2	peg.13	peg	7824	9317	+	Bacteriophage tail sheath protein
YeP2	peg.14	peg	9318	9674	+	Phage tail tube protein
YeP2	peg.15	peg	9671	9952	+	hypothetical protein
YeP2	peg.16	peg	10076	11956	+	Phage tail length tape-measure protein
YeP2	peg.17	peg	12007	13311	+	Phage tail/DNA circulation protein
YeP2	peg.18	peg	13308	14381	+	FIG003269: Prophage tail protein
YeP2	peg.19	peg	14423	14947	+	Prophage baseplate assembly protein V
YeP2	peg.20	peg	14951	15364	+	Bacteriophage protein GP46
YeP2	peg.21	peg	15357	16415	+	Phage FluMu protein gp47
YeP2	peg.22	peg	16406	16987	+	FIG121501: Prophage tail protein
YeP2	peg.23	peg	16994	18193	+	Prophage tail fiber protein
YeP2	peg.24	peg	18209	18391	+	hypothetical protein
YeP2	peg.25	peg	18483	19598	+	Exopolysaccharide production protein ExoZ
YeP2	peg.26	peg	19936	19691	-	DNA-damage-inducible protein I
YeP2	peg.27	peg	20222	19947	-	hypothetical protein
YeP2	peg.28	peg	20544	21104	+	hypothetical protein
YeP2	peg.29	peg	21101	21508	+	hypothetical protein
YeP2	peg.30	peg	22616	21525	-	Site-specific recombinase, phage integrase family
YeP2	peg.31	peg	23152	22895	-	hypothetical protein
YeP2	peg.32	peg	23780	23208	-	FIG01046459: hypothetical protein
YeP2	peg.33	peg	24200	23781	-	hypothetical protein
YeP2	peg.34	peg	24398	24207	-	hypothetical protein
YeP2	peg.35	peg	24988	24386	-	Phage protein
YeP2	peg.36	peg	25353	24988	-	Phage protein
YeP2	peg.37	peg	25924	25355	-	hypothetical protein
YeP2	peg.38	peg	26097	25924	-	hypothetical protein
YeP2	peg.39	peg	26630	26097	-	Hypothetical protein yfdR
YeP2	peg.40	peg	26888	26649	-	hypothetical protein
YeP2	peg.41	peg	27875	26967	-	DNA recombination-dependent growth factor C
YeP2	peg.42	peg	28172	28405	+	hypothetical protein
YeP2	peg.43	peg	28662	28402	-	hypothetical protein
YeP2	peg.44	peg	28991	28878	-	SOS-response repressor and protease LexA (EC 3.4.21.88)
YeP2	peg.45	peg	29783	29127	-	SOS-response repressor and protease LexA (EC 3.4.21.88)
YeP2	peg.46	peg	29882	30079	+	hypothetical protein
YeP2	peg.47	peg	30108	30641	+	Phage protein
YeP2	peg.48	peg	30807	31007	+	hypothetical protein
YeP2	peg.49	peg	31004	32020	+	Replication protein O
YeP2	peg.50	peg	32017	32487	+	hypothetical protein
YeP2	peg.51	peg	32480	33193	+	DNA adenine methylase
YeP2	peg.52	peg	33190	33573	+	Holliday junction resolvase / Crossover junction endodeoxyribonuclease rusA (EC 3.1.22.-)
YeP2	peg.53	peg	33673	34482	+	Phage-related protein
YeP2	peg.54	peg	34479	35480	+	FIG074102: hypothetical protein
YeP2	peg.55	peg	35557	36375	+	Phage antitermination protein Q
YeP2	peg.56	peg	36647	36447	-	hypothetical protein
YeP2	peg.57	peg	37042	37386	+	Phage holin #Lambda-like group I holin
YeP2	peg.58	peg	37389	38015	+	Phage endolysin
YeP2	peg.59	peg	38012	38344	+	hypothetical protein
YeP2	peg.60	peg	38379	38549	+	hypothetical protein
YeP2	peg.61	peg	38712	39185	+	hypothetical protein
YeP2	peg.62	peg	39318	39193	-	hypothetical protein
YeP2	peg.63	peg	39283	39633	+	Phage holin
YeP3	peg.1	peg	78	533	+	Phage terminase, small subunit, P27 family
YeP3	peg.2	peg	536	2266	+	Phage terminase, large subunit
YeP3	peg.3	peg	2310	2465	+	Phage protein
YeP3	peg.4	peg	2465	3694	+	Phage portal protein
YeP3	peg.5	peg	3684	4334	+	Phage prohead protease, HK97 family
YeP3	peg.6	peg	4350	5558	+	Phage major capsid protein
YeP3	peg.7	peg	5611	5826	+	hypothetical protein
YeP3	peg.8	peg	5845	6159	+	Sb8
YeP3	peg.9	peg	6156	6548	+	Sb9
YeP3	peg.10	peg	6548	7066	+	Phage protein (ACLAME 956)
YeP3	peg.11	peg	7063	7614	+	FIG111678: IS, phage, Tn; Transposon-related functions
YeP3	peg.12	peg	7621	7827	+	Phage protein
YeP3	peg.13	peg	7824	9317	+	Bacteriophage tail sheath protein
YeP3	peg.14	peg	9318	9674	+	Phage tail tube protein
YeP3	peg.15	peg	9671	9952	+	hypothetical protein
YeP3	peg.16	peg	10076	11956	+	Phage tail length tape-measure protein
YeP3	peg.17	peg	12007	13311	+	Phage tail/DNA circulation protein
YeP3	peg.18	peg	13308	14381	+	FIG003269: Prophage tail protein
YeP3	peg.19	peg	14381	14947	+	Prophage baseplate assembly protein V
YeP3	peg.20	peg	14951	15364	+	Bacteriophage protein GP46
YeP3	peg.21	peg	15357	16415	+	Putative protein JayE from lambdoid prophage e14 region
YeP3	peg.22	peg	16406	16987	+	Uncharacterized protein YmfQ in lambdoid prophage e14 region
YeP3	peg.23	peg	16994	18193	+	Prophage tail fiber protein
YeP3	peg.24	peg	18209	18391	+	hypothetical protein
YeP3	peg.25	peg	18483	19598	+	hypothetical protein
YeP3	peg.26	peg	19936	19691	-	DNA-damage-inducible protein I
YeP3	peg.27	peg	20222	19947	-	hypothetical protein
YeP3	peg.28	peg	20544	21104	+	hypothetical protein; Some similarities with unknown protein of Photorhabdus and with bacteriophage protein
YeP3	peg.29	peg	21101	21508	+	hypothetical protein
YeP3	peg.30	peg	22616	21525	-	Phage integrase family protein
YeP3	peg.31	peg	23152	22895	-	hypothetical protein
YeP3	peg.32	peg	23780	23208	-	FIG01046459: hypothetical protein
YeP3	peg.33	peg	24194	23781	-	hypothetical protein
YeP3	peg.34	peg	24398	24207	-	hypothetical protein
YeP3	peg.35	peg	24988	24386	-	hypothetical protein
YeP3	peg.36	peg	25353	24988	-	Phage protein
YeP3	peg.37	peg	25924	25355	-	hypothetical protein
YeP3	peg.38	peg	26100	25924	-	hypothetical protein
YeP3	peg.39	peg	26630	26097	-	COG1896: Predicted hydrolases of HD superfamily
YeP3	peg.40	peg	26888	26649	-	hypothetical protein
YeP3	peg.41	peg	27875	26967	-	hypothetical protein
YeP3	peg.42	peg	28172	28405	+	hypothetical protein
YeP3	peg.43	peg	28662	28402	-	hypothetical protein
YeP3	peg.44	peg	29006	28878	-	SOS-response repressor and protease LexA (EC 3.4.21.88)
YeP3	peg.45	peg	29783	29127	-	SOS-response repressor and protease LexA (EC 3.4.21.88)
YeP3	peg.46	peg	29882	30079	+	hypothetical protein
YeP3	peg.47	peg	30108	30641	+	hypothetical protein
YeP3	peg.48	peg	30649	30810	+	hypothetical protein
YeP3	peg.49	peg	30807	31007	+	hypothetical protein
YeP3	peg.50	peg	31079	32020	+	Replication protein O
YeP3	peg.51	peg	32017	32487	+	FIG01224172: hypothetical protein
YeP3	peg.52	peg	32480	32596	+	DNA adenine methylase
YeP3	peg.53	peg	32609	33193	+	DNA adenine methylase (EC 2.1.1.72)
YeP3	peg.54	peg	33190	33573	+	Holliday junction resolvase / Crossover junction endodeoxyribonuclease rusA (EC 3.1.22.-)
YeP3	peg.55	peg	33560	33676	+	hypothetical protein
YeP3	peg.56	peg	33673	34482	+	Phage protein
YeP3	peg.57	peg	34479	35480	+	Uncharacterized protein, YdfU family
YeP3	peg.58	peg	35557	36375	+	Phage antitermination protein Q
YeP3	rna.1	rna	36569	36643	+	tRNA-Pseudo-TTG
YeP3	rna.2	rna	36717	36790	+	tRNA-Met-CAT
YeP3	rna.3	rna	36796	36867	+	tRNA-Gly-TCC
YeP3	peg.59	peg	37389	38015	+	Phage endolysin or lysozyme (ACLAME 32)
YeP3	peg.60	peg	38012	38344	+	hypothetical protein
YeP3	peg.61	peg	38379	38549	+	hypothetical protein
YeP3	peg.62	peg	38712	39185	+	hypothetical protein
YeP3	peg.63	peg	39600	39193	-	hypothetical protein
YeP4	peg.1	peg	60	1457	+	hypothetical protein
YeP4	peg.2	peg	1468	1935	+	hypothetical protein
YeP4	peg.3	peg	2047	2352	+	FIG027828: Putative bacteriophage protein
YeP4	peg.4	peg	2339	2869	+	Lysozyme (EC 3.2.1.17) @ Phage lysozyme (EC 3.2.1.17)
YeP4	peg.5	peg	2862	3362	+	Phage outer membrane lytic protein Rz; Endopeptidase (EC 3.4.-.-)
YeP4	peg.6	peg	3681	4874	+	Integrase
YeP4	peg.7	peg	6437	5037	-	DNA helicase (EC 3.6.4.12), phage-associated
YeP4	peg.8	peg	6481	6975	+	hypothetical protein
YeP4	peg.9	peg	7249	6977	-	Phage protein
YeP4	peg.10	peg	7463	7239	-	hypothetical protein
YeP4	peg.11	peg	9567	7468	-	DNA polymerase, phage-associated
YeP4	peg.12	peg	10443	9664	-	hypothetical protein
YeP4	peg.13	peg	10874	10500	-	hypothetical protein
YeP4	peg.14	peg	11481	10933	-	Phage protein
YeP4	peg.15	peg	12804	11494	-	Phage protein
YeP4	peg.16	peg	13541	12807	-	hypothetical protein
YeP4	peg.17	peg	13683	13546	-	hypothetical protein
YeP4	peg.18	peg	14730	14053	-	Phage repressor
YeP4	peg.19	peg	14871	15071	+	hypothetical protein
YeP4	peg.20	peg	15075	17240	+	DNA primase, phage associated
YeP4	peg.21	peg	17571	17807	+	hypothetical protein
YeP4	peg.22	peg	17946	17827	-	hypothetical protein
YeP4	peg.23	peg	18080	18493	+	hypothetical protein
YeP4	peg.24	peg	18528	18722	+	hypothetical protein
YeP4	peg.25	peg	18725	20329	+	Bacteriophage head to tail connecting protein
YeP4	peg.26	peg	20326	20565	+	hypothetical protein
YeP4	peg.27	peg	20552	21355	+	Bacteriophage endoprotease
YeP4	peg.28	peg	21569	22477	+	Bacteriophage FIG01080306: hypothetical protein
YeP4	peg.29	peg	22571	23092	+	Bacteriophage FIG00948992: hypothetical protein
YeP4	peg.30	peg	23092	25065	+	Bacteriophage FIG00948527: hypothetical protein
YeP4	peg.31	peg	25071	25517	+	hypothetical protein
YeP4	peg.32	peg	25521	26003	+	Bacteriophage FIG00948268: hypothetical protein
YeP4	peg.33	peg	26000	28126	+	hypothetical protein
YeP4	peg.34	peg	28132	29424	+	hypothetical protein
YeP4	peg.35	peg	29421	31946	+	hypothetical protein
YeP4	peg.36	peg	32295	31948	-	hypothetical protein
YeP4	peg.37	peg	33077	32367	-	hypothetical protein
YeP4	peg.38	peg	33119	33469	+	FIG01078512: hypothetical protein
YeP4	peg.39	peg	33937	35028	+	Phage DNA packaging
YeP5	peg.1	peg	29	1426	+	Phage protein
YeP5	peg.2	peg	1437	1904	+	hypothetical protein
YeP5	peg.3	peg	2016	2321	+	FIG027828: Putative bacteriophage protein
YeP5	peg.4	peg	2308	2838	+	Phage lysin, 1,4-beta-N-acetylmuramidase (EC 3.2.1.17) or lysozyme
YeP5	peg.5	peg	2831	3331	+	Phage outer membrane lytic protein Rz; Endopeptidase (EC 3.4.-.-)
YeP5	peg.6	peg	3650	4843	+	Integrase
YeP5	peg.7	peg	5009	4809	-	hypothetical protein
YeP5	peg.8	peg	6406	5006	-	DNA helicase, phage-associated
YeP5	peg.9	peg	6450	6944	+	hypothetical protein
YeP5	peg.10	peg	7218	6946	-	Phage protein
YeP5	peg.11	peg	7432	7208	-	hypothetical protein
YeP5	peg.12	peg	9536	7437	-	DNA polymerase I (EC 2.7.7.7)
YeP5	peg.13	peg	10412	9633	-	hypothetical protein
YeP5	peg.14	peg	10843	10469	-	Phage protein
YeP5	peg.15	peg	11450	10902	-	Phage protein
YeP5	peg.16	peg	12773	11463	-	Phage protein
YeP5	peg.17	peg	13510	12776	-	hypothetical protein
YeP5	peg.18	peg	14699	14022	-	Phage repressor
YeP5	peg.19	peg	14840	15040	+	hypothetical protein
YeP5	peg.20	peg	15044	17209	+	DNA primase, phage associated
YeP5	peg.21	peg	17540	17776	+	hypothetical protein
YeP5	peg.22	peg	17915	17796	-	hypothetical protein
YeP5	peg.23	peg	18049	18462	+	hypothetical protein
YeP5	peg.24	peg	18497	18691	+	hypothetical protein
YeP5	peg.25	peg	18694	20298	+	Phage protein
YeP5	peg.26	peg	20295	20534	+	hypothetical protein
YeP5	peg.27	peg	20521	21324	+	FIG01079221: hypothetical protein
YeP5	peg.28	peg	21538	22446	+	FIG01080306: hypothetical protein
YeP5	peg.29	peg	22501	23061	+	hypothetical protein
YeP5	peg.30	peg	23061	25034	+	Phage protein
YeP5	peg.31	peg	25040	25486	+	hypothetical protein
YeP5	peg.32	peg	25490	25972	+	hypothetical protein
YeP5	peg.33	peg	25969	28095	+	hypothetical protein
YeP5	peg.34	peg	28101	29393	+	hypothetical protein
YeP5	peg.35	peg	29390	31915	+	hypothetical protein
YeP5	peg.36	peg	32264	31917	-	hypothetical protein
YeP5	peg.37	peg	33070	32336	-	hypothetical protein
YeP5	peg.38	peg	33112	33462	+	FIG01078512: hypothetical protein
YeP6	peg.1	peg	29	1426	+	Phage protein
YeP6	peg.2	peg	1437	1904	+	hypothetical protein
YeP6	peg.3	peg	2016	2321	+	FIG027828: Putative bacteriophage protein
YeP6	peg.4	peg	2308	2838	+	Phage lysin, 1,4-beta-N-acetylmuramidase (EC 3.2.1.17) or lysozyme
YeP6	peg.5	peg	2831	3331	+	Phage outer membrane lytic protein Rz; Endopeptidase (EC 3.4.-.-)
YeP6	peg.6	peg	3650	4843	+	Integrase
YeP6	peg.7	peg	5009	4809	-	hypothetical protein
YeP6	peg.8	peg	6406	5006	-	DNA helicase, phage-associated
YeP6	peg.9	peg	6450	6944	+	hypothetical protein
YeP6	peg.10	peg	7218	6946	-	Phage protein
YeP6	peg.11	peg	7432	7208	-	hypothetical protein
YeP6	peg.12	peg	9536	7437	-	DNA polymerase I (EC 2.7.7.7)
YeP6	peg.13	peg	10412	9633	-	hypothetical protein
YeP6	peg.14	peg	10843	10469	-	Phage protein
YeP6	peg.15	peg	11450	10902	-	Phage protein
YeP6	peg.16	peg	12773	11463	-	Phage protein
YeP6	peg.17	peg	13510	12776	-	hypothetical protein
YeP6	peg.18	peg	14699	14022	-	Phage repressor
YeP6	peg.19	peg	14840	15040	+	hypothetical protein
YeP6	peg.20	peg	15044	17209	+	DNA primase, phage associated
YeP6	peg.21	peg	17540	17776	+	hypothetical protein
YeP6	peg.22	peg	17915	17796	-	hypothetical protein
YeP6	peg.23	peg	18049	18462	+	hypothetical protein
YeP6	peg.24	peg	18497	18691	+	hypothetical protein
YeP6	peg.25	peg	18694	20298	+	Phage protein
YeP6	peg.26	peg	20295	20534	+	hypothetical protein
YeP6	peg.27	peg	20521	21324	+	FIG01079221: hypothetical protein
YeP6	peg.28	peg	21538	22446	+	FIG01080306: hypothetical protein
YeP6	peg.29	peg	22501	23061	+	hypothetical protein
YeP6	peg.30	peg	23061	25034	+	Phage protein
YeP6	peg.31	peg	25040	25486	+	hypothetical protein
YeP6	peg.32	peg	25490	25972	+	hypothetical protein
YeP6	peg.33	peg	25969	28095	+	hypothetical protein
YeP6	peg.34	peg	28101	29393	+	hypothetical protein
YeP6	peg.35	peg	29390	31915	+	hypothetical protein
YeP6	peg.36	peg	32264	31917	-	hypothetical protein
YeP6	peg.37	peg	33070	32336	-	hypothetical protein
YeP6	peg.38	peg	33112	33462	+	FIG01078512: hypothetical protein
